# Supplementary material for: Hematocrit Self-Testing in Patients with Polycythemia Vera and Other Hematological Conditions: Assessing the Accuracy of the StatStrip Xpress® 2 LAC/Hb/Hct Device and User Opinion about the Device in Real-World Clinical Practice
Source: MDPI journal article supplement (doi:10.3390/jcm11144234), 2022-07-21
Supplement: s1 [file s1]

## Supplementary Information S2

### Healthcare Professionals questionnaire at study conclusion

Study site: ....

|              |                                          |
|--------------|------------------------------------------|
| <b>Date:</b> | <b>Study personnel (name, function):</b> |
| <br><br>     | <br><br>                                 |

1. How did **you** get along with the StatStrip Xpress 2 Hb / Hct device when taking measurements on patients?

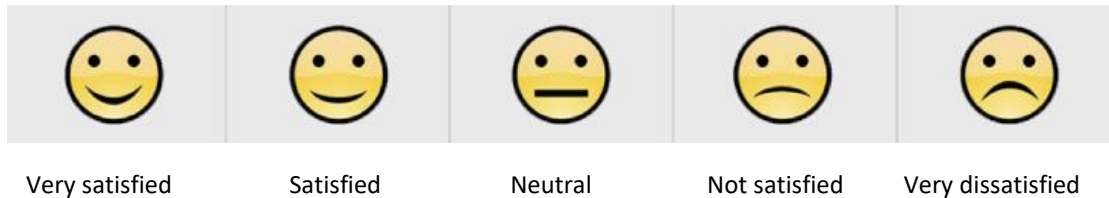

2. What was the most difficult thing for **you** when using the StatStrip Xpress 2 Hb / Hct device? (Please tick what comes closest to your answer.)

- ☐ Reading the manual (font size, images)
- ☐ Understanding the manual
- ☐ Opening the lancet (needle case)
- ☐ Finger prick (to obtain a blood drop)
- ☐ Filling the test strip with blood
- ☐ Operating the device (keyboard, inserting test strips, display)

3. How did the **patients** get along on average with the StatStrip Hb / Hct device during self-measurement?

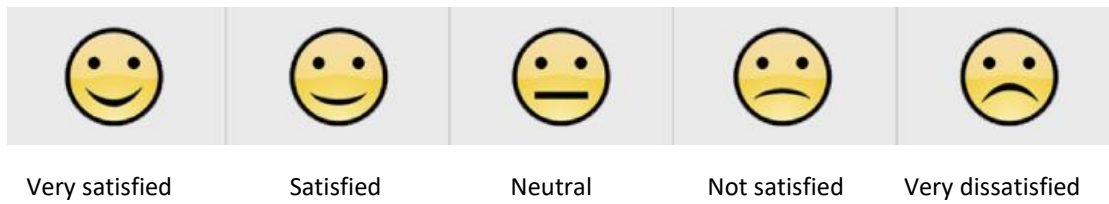

4. What do you think was the most difficult part for the **patient** using the StatStrip Xpress 2 Hb / Hct device? (Please tick what comes closest to your answer.)

- ☐ Reading the manual (font size, images)
- ☐ Understanding the manual
- ☐ Opening the lancet (needle case)
- ☐ Finger prick (to obtain a blood drop)
- ☐ Filling the test strip with blood
- ☐ Operating the device (keyboard, inserting test strips, display)

5. Would you trust **the patients** to use the measuring device at home (with appropriate instruction and practice)?

- ☐ Yes
- ☐ No
- ☐ Don't know
